# Supplementary material for: Innovative Aqueous Nanoemulsion Prepared by Phase Inversion Emulsification with Exceptional Homogeneity
Source: MDPI journal article supplement (doi:10.3390/pharmaceutics15071878), 2023-07-04
Supplement: s1 [file s1]

Supplementary data

# Innovative aqueous nanoemulsion prepared by phase inversion emulsification with exceptional homogeneity.

Patrícia C. Pires <sup>1,2,3,†</sup>, Mariana Fernandes <sup>1,4,†</sup>, Francisca Nina <sup>1,4,†</sup>, Francisco Gama <sup>1,4,†</sup>, Maria F. Gomes <sup>1,4</sup>, Lina E. Rodrigues <sup>1,4</sup>, Sara Meirinho <sup>1,4</sup>, Samuel Silvestre <sup>1,5</sup>, Gilberto Alves <sup>1,4</sup>, Adriana O. Santos <sup>1,4\*</sup>

<sup>1</sup> CICS-UBI—Health Sciences Research Centre, University of Beira Interior, Av. Infante D. Henrique, 6200-506 Covilhã, Portugal;

<sup>2</sup> Department of Pharmaceutical Technology, Faculty of Pharmacy, University of Coimbra, 3000-548 Coimbra, Portugal

<sup>3</sup> REQUIMTE/LAQV—Associated Laboratory for Green Chemistry of the Network of Chemistry and Technology, Faculty of Pharmacy, University of Coimbra, 3000-548 Coimbra, Portugal

<sup>4</sup> Faculty of Health Sciences, University of Beira Interior, Av. Infante D. Henrique, 6200-506 Covilhã, Portugal

<sup>5</sup> Faculty of Sciences, University of Beira Interior, Rua Marquês d'Ávila e Bolama, 6201-001 Covilhã, Portugal

\* Correspondence: asantos@fcsaude.ubi.pt

† These authors contributed equally to this work.

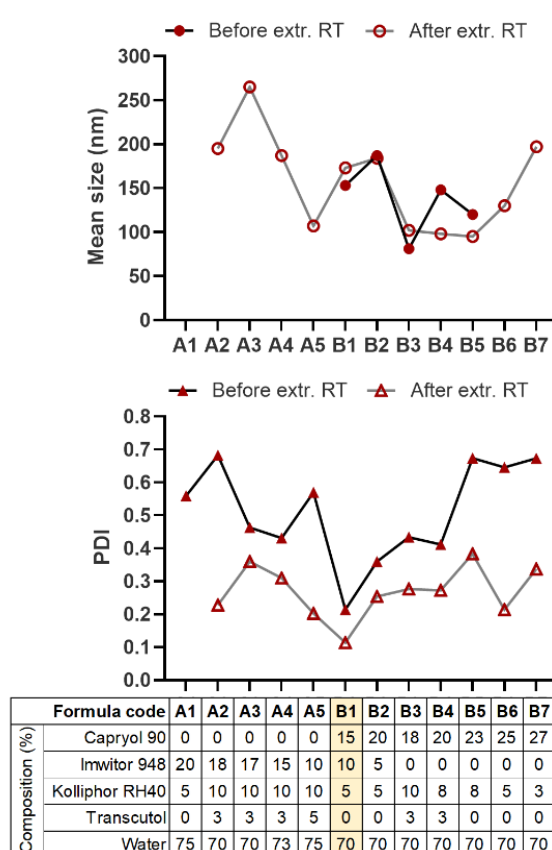

**Figure S1.** Droplet size characterization of the initial screen emulsion formulas before and after extrusion. Extrusion (Avanti Polar Lipids Mini Extruder®) through polycarbonate membranes with a pore of 200 nm (19 mm, Whatman® Nuclepore™ Track-Etched, Sigma-Aldrich, Steinheim, Germany) was used as a means of homogenization known as pre-mix membrane emulsification. Some mean size values before extrusion are missing due to insufficient quality in cumulants analysis because of high heterogeneity in size. PDI—polydispersity index; RT—room temperature.
